# Supplementary material for: Mandatory Notification of Panton–Valentine Leukocidin-Positive Methicillin-Resistant Staphylococcus aureus in Saxony, Germany: Analysis of Cases from the City of Leipzig in 2019
Source: MDPI journal article supplement (doi:10.3390/microorganisms11061437), 2023-05-29
Supplement: s1 [file s1]

**Nr.**

## Ermittlungsbogen

**Nachweis von caMRSA Panton-Valentine-Leukozidin (PVL)-bildend**  
(gemäß IfSGMeldeVO vom 16.12.2012)

Material: ..... Entnahmedatum: ..... Labor: .....

**Patient\*in:** Name, Vorname: .....

Geburtsdatum: .....

Wohnanschrift: .....

Telefonnummer: .....

E-Mail: .....

☐ weiblich

☐ männlich

☐ divers

Herkunftsland: .....

Reiseanamnese: .....

**Krankenhaus / Einrichtung / Station:** .....

**aktuell hospitalisiert?**

☐ ja seit wann?..... ☐ nein

**zum Zeitpunkt der Befundung:**

☐ Kolonisation ☐ Infektion

**Diagnose:**

☐ Abszess

☐ Furunkel

☐ andere

☐ **caMRSA bekannt?**

☐ ja ☐ nein

Wenn ja, wann und wo erfolgte der Erstnachweis? .....

Behandlung/Sanierung begonnen? ☒ ja ☐ nein

Wenn ja - wann und womit? .....

Kontaktpersonen aus häuslichen Umfeld ermittelt? ☐ ja ☐ nein

Datum: ..... behandelndes ärztliches Personal: ..... Sign.: .....

(bitte in Druckschrift ausfüllen)
