# Supplementary material for: Mandatory Notification of Panton–Valentine Leukocidin-Positive Methicillin-Resistant Staphylococcus aureus in Saxony, Germany: Analysis of Cases from the City of Leipzig in 2019
Source: MDPI journal article supplement (doi:10.3390/microorganisms11061437), 2023-05-29
Supplement: s1 [file s1]

## Contact form caMRSA PVL+

**patient/ resident/ citizen:**

|                                                            |                                                                                                      |
|------------------------------------------------------------|------------------------------------------------------------------------------------------------------|
| surname:                                                   | date of birth:                                                                                       |
| name:                                                      | female <input type="checkbox"/><br>male <input type="checkbox"/><br>diverse <input type="checkbox"/> |
| address:                                                   |                                                                                                      |
| country of origin/ region/ history of travel or migration: |                                                                                                      |
| treating physician: _____                                  |                                                                                                      |

household contacts:

| surname | name | date of birth | (family) relationship | telephone | address |
|---------|------|---------------|-----------------------|-----------|---------|
|         |      |               |                       |           |         |
|         |      |               |                       |           |         |
|         |      |               |                       |           |         |
|         |      |               |                       |           |         |
|         |      |               |                       |           |         |

| decolonization         | 1st cycle | 2nd cycle | 3rd cycle |
|------------------------|-----------|-----------|-----------|
| period                 |           |           |           |
| intranasal application |           |           |           |
| throat rinse           |           |           |           |
| body wash              |           |           |           |
| oral antibiotic        |           |           |           |

[illegible]
