# Supplementary material for: Mandatory Notification of Panton–Valentine Leukocidin-Positive Methicillin-Resistant Staphylococcus aureus in Saxony, Germany: Analysis of Cases from the City of Leipzig in 2019
Source: MDPI journal article supplement (doi:10.3390/microorganisms11061437), 2023-05-29
Supplement: s1 [file s1]

# Verlaufsberichtsbogen caMRSA, PVL+

## PatientIn / BewohnerIn / BürgerIn

|                                     |                                                                                                           |
|-------------------------------------|-----------------------------------------------------------------------------------------------------------|
| Name:                               | Geburtsdatum:                                                                                             |
| Vorname:                            | männlich <input type="checkbox"/><br>weiblich <input type="checkbox"/><br>divers <input type="checkbox"/> |
| Wohnanschrift:                      |                                                                                                           |
| Herkunftsland/Region/Reiseanamnese: |                                                                                                           |
| behandelnder Arzt:                  |                                                                                                           |

**(familiäre) Kontaktpersonen**

| Name | Vorname | Geb. datum | Verwandschafts-<br>verhältnis | Tel. | Anschrift |
|------|---------|------------|-------------------------------|------|-----------|
|      |         |            |                               |      |           |
|      |         |            |                               |      |           |
|      |         |            |                               |      |           |
|      |         |            |                               |      |           |
|      |         |            |                               |      |           |

| <b>Sanierung</b>               | <b>1. Sanierung</b> | <b>2. Sanierung</b> | <b>3. Sanierung</b> |
|--------------------------------|---------------------|---------------------|---------------------|
| Datum des Sanierungszeitraumes |                     |                     |                     |
| Nasensalbe                     |                     |                     |                     |
| Rachenspüllösung               |                     |                     |                     |
| Waschlotion                    |                     |                     |                     |
| orales Antibiotika             |                     |                     |                     |

[illegible]
