# Supplementary material for: Mandatory Notification of Panton–Valentine Leukocidin-Positive Methicillin-Resistant Staphylococcus aureus in Saxony, Germany: Analysis of Cases from the City of Leipzig in 2019
Source: Microorganisms. 2023 May 29;11(6):1437. doi: 10.3390/microorganisms11061437 (PMC10300856; doi:10.3390/microorganisms11061437)
Supplement: Supplementary file 1 [file microorganisms-11-01437-s001.zip › Table S1 final.xlsx]

## Sheet: table S1
case no.	case(s) with epidemiological link	index/ contact person	age	gender	culture site	location	MRSA infection (category)	MRSA detection (hospital/ community)	history of travel or migration	country (travel/migration)	home country	species	arcA	etd	lukPV	seh	COMER	mecA	SCCmec-type	spa-type	clonal complex	antibiotic resistance phenotype	sample name Sequence Read Archives (SRA)	decolonization 1st cycle	1st cycle successful?	decolonization 2nd cycle	successfull	preparation for decolonisation of the nose	preparation for decolonisation of the throat	preparation for decolonisation of the body
1	none	index	56	m	swab wound	na	skin and soft tissue infection	hospital	yes	Greece, Mauritius	Germany	S. aureus	-	-	+	-	nd	+	IV a	t665	CC30	PEN, OXA, ERY, TET, FOX, OxaSu		na	na	na	na	na	na	na
2	2,3,4,47	contact	13	f	swab	nose	none (MRSA screening)	community	yes	Afghanistan	Afghanistan	S. aureus	-	-	+	-	nd	+	IV a	t363	CC8	PEN, OXA, ERY, CIP, MXF, FOX, OxaSu		yes	yes	no		Mupirocin	Chlorhexidine	Octenidine
3	2,3,4,47	contact	19	m	swab	nose	none (MRSA screening)	community	yes	Afghanistan	Afghanistan	S. aureus	-	-	+	-	nd	+	IV a	t363	CC8	PEN, OXA, ERY, CIP, MXF, FOX, OxaSu		yes	no	yes	yes	Mupirocin	Chlorhexidine	Octenidine
4	2,3,4,47	index	7	f	swab	nose	skin and soft tissue infection	community	yes	Afghanistan	Afghanistan	S. aureus	-	-	+	-	nd	+	IV c	t005	CC22	PEN, OXA, GEN, ERY, FOX, OxaSu		na	na	na	na	na	na	na
5	none	index	1	m	swab wound	abdomen	skin and soft tissue infection	hospital	no	none	Germany	S. aureus	+	-	+	-	nd	+	IV a	t008	CC8	PEN, OXA, ERY, FOX, OxaSu		na	na	na	na	na	na	na
6	6.12	index	79	m	swab	nose	none (MRSA screening)	hospital	na	na	Germany	S. aureus	-	-	+	-	+	+	IV c	t6172	CC8	PEN, OXA, GEN, ERY, FOX, OxaSu	S. aureus 19-00646	yes	yes	no		Mupirocin	Octenidine	Octenidine
7	7,8,9	index	49	f	swab	nose	skin and soft tissue infection	community	yes	Vietnam	Germany	S. aureus	-	-	+	+	nd	+	IV b	t5388	CC1	PEN, OXA, FUS, FOX, OxaSu		yes	yes	no		na	na	na
8	7,8,9	contact	21	m	swab abscess	na	skin and soft tissue infection	na	yes	New Zeeland	Germany	S. aureus	-	-	+	+	nd	+	IV b	t5388	CC1	PEN, OXA, FUS, FOX, OxaSu		yes	na	na	na	Mupirocin	Polyhexanide	Octenidine
9	7,8,9	contact	22	f	swab	axilla	none (MRSA screening)	community	yes	New Zeeland	Germany	S. aureus	-	-	+	+	nd	+	IV b	t5388	CC1	PEN, OXA, FUS, FOX, OxaSu		yes	no	yes	na	Mupirocin	Octenidine	Octenidine
10	10,15,16,17,18,28,54	index	18	f	urin	urethral	urinary tract infection	hospital	yes	Chechnya	Chechnya	S. aureus	-	-	+	-	nd	+	IV c	t002	CC5	PEN, ERY, FOX		na	na	na	na	na	na	na
11	none	index	13	f	swab abscess	na	skin and soft tissue infection	community	no	none	Germany	S. aureus	-	-	+	-	nd	+	IV b	t8746	CC8	PEN, OXA, FOX, OxaSu		na	na	na	na	na	na	na
12	6.12	contact	72	f	swab	axilla	none (MRSA screening)	community	no	none	Germany	S. aureus	-	-	+	-	+	+	IV c	t6172	CC8	PEN, OXA, GEN, ERY, FOX, OxaSu	S. aureus 19-00928	yes	yes	no		Mupirocin	Octenidine	Octenidine
13	none	index	23	m	swab abscess	na	skin and soft tissue infection	community	yes	Iceland	Germany	S. aureus	-	-	+	-	nd	+	V	t021	CC30	PEN, OXA, GEN, CIP, FOX		yes	no	yes	yes	Mupirocin	Chlorhexidine	Octenidine
14	14,29,33	index	4	m	swab abscess	na	skin and soft tissue infection	hospital	yes	India	Germany	S. aureus	-	-	+	-	nd	+	V	t657	ST772	PEN, OXA, GEN, ERY, CIP, MXF, FOX, OxaSu		yes	yes	no		Mupirocin	Octenidine	Octenidine
15	10,15,16,17,18,28,54	contact	9	m	swab	nose	none (MRSA screening)	na	yes	Chechnya	Chechnya	S. aureus	-	-	+	-	nd	+	IV c	t002	CC5	PEN, OXA, ERY, FOX, OxaSu		na	na	na	na	na	na	na
16	10,15,16,17,18,28,54	contact	3	m	swab	nose	none (MRSA screening)	na	yes	Chechnya	Chechnya	S. aureus	-	-	+	-	nd	+	IV c	t002	CC5	PEN, OXA, ERY, FOX, OxaSu		na	na	na	na	na	na	na
17	10,15,16,17,18,28,54	contact	42	f	swab	nose	skin and soft tissue infection	na	yes	Chechnya	Chechnya	S. aureus	-	-	+	-	nd	+	IV c	t002	CC5	PEN, OXA, ERY, FOX, OxaSu		na	na	na	na	na	na	na
18	10,15,16,17,18,28,54	contact	16	m	swab	nose	skin and soft tissue infection	na	yes	Chechnya	Chechnya	S. aureus	-	-	+	-	nd	+	IV c	t002	CC5	PEN, OXA, ERY, FOX, OxaSu		na	na	na	na	na	na	na
19	19,20	index	13	f	swab	organ	organ abscess	hospital	no	none	Germany	S. aureus	-	-	+	-	nd	+	V	t021	CC30	PEN, OXA, GEN, ERY, CIP, MXF, FOX		yes	na	na	na	na	na	na
20	19,20	contact	37	f	swab abscess	na	skin and soft tissue infection	community	no	none	Germany	S. aureus	-	-	+	-	nd	+	V	t021	CC30	PEN, OXA, GEN, ERY, CIP, MXF, FOX		yes	na	na	na	na	na	na
21	21,23,24	index	8	f	swab abscess	na	skin and soft tissue infection	community	yes	India	Germany	S. aureus	-	-	+	-	nd	+	V	t657	ST772	PEN, OXA, GEN, ERY, CIP, MXF, FOX, OxaSu		na	na	na	na	na	na	na
22	none	index	30	m	swab abscess	na	skin and soft tissue infection	community	yes	Syria	Syria	S. aureus	-	-	+	-	+	+	IV c	t008	CC8	PEN, OXA, FOX, (OxaSu)	S. aureus 19-01169	na	na	na	na	na	na	na
23	21,23,24	contact	6	m	swab	nose	none (MRSA screening)	community	yes	India	Germany	S. aureus	-	-	+	-	nd	+	V	t657	ST772	PEN, OXA, GEN, ERY, CIP, MXF, FOX, OxaSu		na	na	na	na	na	na	na
24	21,23,24	contact	44	f	swab	nose	none (MRSA screening)	community	yes	India	Germany	S. aureus	-	-	+	-	nd	+	V	t657	ST772	PEN, OXA, GEN, ERY, CIP, MXF, FOX, OxaSu		na	na	na	na	na	na	na
25	25.26	index	24	f	swab abscess	na	skin and soft tissue infection	hospital	no	none	Germany	S. aureus	-	-	+	-	+	+	IV c	t008	CC8	PEN, OXA, FOX, OxaSu	S. aureus 19-01274	yes	na	na	na	Mupirocin	Octenidine	Octenidine
26	25.26	contact	24	m	swab abscess	na	skin and soft tissue infection	community	no	none	Germany	S. aureus	-	-	+	-	+	+	IV c	t008	CC8	PEN, OXA, FOX, OxaSu	S. aureus 19-01359	yes	na	na	na	Mupirocin	na	Octenidine
27	none	index	13	m	swab abscess	na	skin and soft tissue infection	hospital	yes	Cuba	Germany	S. aureus	-	-	+	+	nd	+	V	t127	CC1	PEN, OXA, GEN, TET, FUS, FOX, OxaSu		yes	na	na	na	na	na	na
28	10,15,16,17,18,28,54	contact	71	m	swab	nose	none (MRSA screening)	community	yes	Chechnya	Chechnya	S. aureus			+		nd	+	IV c	t002	CC5	PEN, OXA, ERY, FOX, OxaSu		na	na	na	na	na	na	na
29	14,29,33	contact	37	f	swab	nose	none (MRSA screening)	na	yes	India	India	S. aureus	-	-	+	-	nd	+	V	t657	ST772	PEN, OXA, GEN, ERY, CIP, MXF, FOX, OxaSu		yes	yes	no		Mupirocin	Chlorhexidine	Octenidine
30	none	index	48	m	swab abscess	na	skin and soft tissue infection	hospital	yes	Thailand	Germany	S. aureus	-	-	+	-	nd	+	V	t437	ST59	BEN, OXA, GEN, ERY, CLI, CXI, OxaSu		na	na	na	na	na	na	na
31	none	index	34	m	swab abscess	na	skin and soft tissue infection	hospital	yes	Iran	Iran	S. aureus	-	-	+	-	nd	+	IV c	t852	CC22	BEN, OXA, GEN, ERY, CIP, MOX, CXI, OxaSu		na	na	na	na	na	na	na
32	none	index	58	f	swab	nose	none (MRSA screening)	na	no	none	Germany	S. aureus	-	-	+	-	nd	+	IV a	t692	ST88	BEN, OXA, ERY, TET, CXI, OxaSu		na	na	na	na	na	na	na
33	14,29,33	contact	49	m	swab	nose	none (MRSA screening)	na	yes	India	India	S. aureus	-	-	+	-	nd	+	V	t657	ST772	BEN, OXA, GEN, ERY, CIP, MOX, CXI, OxaSu		yes	yes	no		na	na	na
34	none	index	9	m	swab	nose	none (MRSA screening)	hospital	yes	Syria	Syria	S. aureus	-	-	+	+	nd	+	V	t127	CC1	BEN, OXA, GEN, FUS, CXI		na	na	na	na	Octenidin	Chlorhexidine	Octenidine
35	none	index	1	f	swab abscess	na	skin and soft tissue infection	hospital	yes	Cuba, Mexico	Germany	S. aureus	+	-	+	-	nd	+	IV a	t008	CC8	BEN, OXA, ERY, CIP, MOX, CXI, OxaSu		na	na	na	na	na	na	na
36	none	index	12	f	swab abscess	na	skin and soft tissue infection	hospital	no	none	Germany	S. aureus	+	-	+	-	nd	+	IV a	t008	CC8	BEN, OXA, ERY, CIP, MOX, CXI, OxaSu		na	na	na	na	na	na	na
37	none	index	3	f	na	na	na	na	no	none	Germany	S. aureus	-	-	+	-	nd	+	IV c	t002	CC5	BEN, OXA, ERY, TET, CXI, OxaSu		na	na	na	na	na	na	na
38	none	index	3	f	swab	nose	none (MRSA screening)	community	yes	Georgia	Georgia	S. aureus	-	-	+	-	nd	+	IV c	t002	CC5	BEN, OXA, TET, CXI, OxaSu		yes	na	na	na	na	na	na
39	none	index	72	m	swab abscess	na	skin and soft tissue infection	community	yes	Afghanistan	Afghanistan	S. aureus	-	-	+	-	nd	+	V	t657	ST772	BEN, OXA, ERY, TET, CIP, MOX, CXI, OxaSu		na	na	na	na	na	na	na
40	none	index	23	f	swab abscess	na	skin and soft tissue infection	community	yes	Cuba	Cuba	S. aureus	-	-	+	-	+	+	IV c	t008	CC8	BEN, OXA, ERY, CXI, OxaSu	S. aureus 19-02721	na	na	na	na	na	na	na
41	none	index	57	m	swab	nose	none (MRSA screening)	hospital	yes	Cuba	Germany	S. aureus	+	-	+	-	nd	+	IV a	t008	CC8	BEN, OXA, ERY, CIP, MOX, CXI, OxaSu		yes	no	yes	yes	Mupirocin	Chlorhexidine, Octenidine	Octenidine
42	none	index	37	m	swab abscess	na	skin and soft tissue infection	hospital	no	none	Germany	S. aureus	-	-	+	-	nd	+	V	t3523	ST59	BEN, OXA, ERY, CLI, TET, CXI, OxaSu		na	na	na	na	na	na	na
43	none	index	23	m	swab abscess	na	skin and soft tissue infection	hospital	na	na	na	S. aureus	-	-	+	-	nd	+	V	t021	CC30	BEN, OXA, GEN, ERY, CIP, MOX, CXI		na	na	na	na	na	na	na
44	none	index	2	m	swab	na	na	na	na	na	Germany	S. aureus			+		nd	+	IV a	t005	CC22	BEN, OXA, GEN, CIP, MOX, CXI, OxaSu		yes	na	na	na	Octenidin	na	Octenidine
45	45.49	index	33	f	swab abscess	na	skin and soft tissue infection	hospital	yes	Cuba	Germany	S. aureus	+	-	+	-	nd	+	IV a	t008	CC8	BEN, OXA, ERY, CIP, MOX, CXI, OxaSu		yes	na	na	na	Mupirocin	Octenidine	Octenidine
46	none	index	53	m	swab abscess	hand	skin and soft tissue infection	hospital	yes	Cuba	Germany	S. aureus	-	-	+	-	+	+	IV c	t068	CC8	BEN, OXA, CXI, OxaSu	S. aureus 19-03002	na	na	na	na	na	na	na
47	2,3,4,47	index	13	f	swab abscess	na	skin and soft tissue infection	hospital	yes	Afghanistan	Afghanistan	S. aureus	-	-	+	-	nd	+	IV a	t363	CC8	BEN, OXA, ERY, MOX, CXI, OxaSu		na	na	na	na	na	na	na
48	none	index	20	f	swab abscess	na	skin and soft tissue infection	community	yes	Peru, Ecuador, Bolivia, Colombia, Thailand	Germany	S. aureus	-	-	+	-	nd	+	IV a	t008	CC8	BEN, OXA, CXI, OxaSu		yes	yes	no		Mupirocin	Octenidine	Octenidine
49	45.49	contact	41	m	swab	nose	none (MRSA screening)	community	yes	Cuba	Germany	S. aureus	+	-	+	-	nd	+	IV a	t008	CC8	BEN, OXA, ERY, CIP, MOX, CXI, OxaSu		yes	na	na	na	Mupirocin	Octenidine	Octenidine
50	none	index	34	m	bioptate	na	skin and soft tissue infection	hospital	na	na	na	S. aureus	+	-	+	-	nd	+	IV a	t008	CC8	BEN, OXA, ERY, CIP, MOX, CXI, OxaSu		na	na	na	na	na	na	na
51	none	index	32	f	swab wound	na	skin and soft tissue infection	hospital	na	na	na	S. aureus	-	-	+	-	+	+	IV c	t008	CC8	BEN, OXA, GEN, CXI, OxaSu	S. aureus 19-03580	na	na	na	na	na	na	na
52	none	index	33	m	swab	nose	none (MRSA screening)	community	no	none	Germany	S. aureus	-	-	+	-	nd	+	IV c	t088	CC5	BEN, OXA, CXI, OxaSu		yes	na	na	na	na	na	na
53	none	index	21	f	swab abscess	na	skin and soft tissue infection	community	na	na	Germany	S. aureus	-	-	+	-	nd	+	V	t657	ST772	BEN, OXA, ERY, TET, CIP, TRS i, MOX, CXI, OxaSu		na	na	na	na	na	na	na
54	10,15,16,17,18,28,54	contact	12	m	swab	nose	none (MRSA screening)	na	yes	Chechnya	Chechnya	S. aureus	-	-	+	-	nd	+	IV c	t002	CC5	BEN, OXA, ERY, CXI, OxaSu		na	na	na	na	na	na	na
55	none	index	68	m	swab	nose	none (MRSA screening)	community	no	none	Germany	S. aureus	-	-	+	-	nd	+	V	t034	ST398	BEN, OXA, ERY, CLI, TET, CXI		na	na	na	na	na	na	na
56	none	index	28	f	swab abscess	na	skin and soft tissue infection	community	yes	Dominican Republic, Egypt	Germany	S. aureus	-	-	+	-	nd	+	IV a	t665	CC30	BEN, OXA, ERY, TET, CXI, OxaSu		yes	yes	no		Mupirocin	Octenidine	Octenidine
57	none	index	27	m	swab	nose	none (MRSA screening)	hospital	na	na	Germany	S. aureus	-	-	+	-	nd	+	IV c	t019	CC30	BEN, OXA, CXI, OxaSu		na	na	na	na	na	na	na
58	none	index	26	m	swab	eye	conjunctivitis	community	yes	New Zeeland	Germany	S. aureus	-	-	+	-	nd	+	IV c	t105	CC5	BEN, OXA, CXI, OxaSu		yes	na	na	na	Mupirocin	Octenidine	Octenidine
